# Supplementary material for: Pathogenic Variant Frequencies in Hereditary Haemorrhagic Telangiectasia Support Clinical Evidence of Protection from Myocardial Infarction
Source: MDPI journal article supplement (doi:10.3390/jcm13010250), 2023-12-31
Supplement: s1 [file s1]

## **Pathogenic Variant Frequencies in Hereditary Haemorrhagic**

## **Telangiectasia Support Clinical Evidence of Protection from Myocardial Infarction.**

Kinshuk Jain, Sarah C. McCarley, Ghazel Mukhtar, Anna Ferlin, Andrew Fleming,  
Deborah J Morris-Rosendahl, Claire L Shovlin

### **Data Supplement**

**TABLE S1:** *ACVRL1* HHT-causal missense variants across 3 data series

TABLE S1:

**ACVRL1 HHT-causal missense variants across 3 data series**

| Missense | c.        | p.            | Series 3 | Series 2 | Series 1 |
|----------|-----------|---------------|----------|----------|----------|
| 1        | c.100T>C  | p.Cys43Arg    |          | 1        |          |
| 2        | c.101G>A  | p.Cys34Tyr    | 1        |          |          |
| 3        | c.107G>A  | p.Cys36Tyr    | 1        | 1        |          |
| 4        | c.121T>C  | p.Cys41Arg    | 1        |          |          |
| 5        | c.140G>C  | p.Arg47Pro    | 2        | 1        |          |
| 6        | c.142G>A  | p.Gly48Arg    | 1        |          |          |
| 7        | c.143G>A  | p.Gly48Glu    | 1        |          |          |
| 8        | c.148T>G  | p.Try50Gly    | 1        |          |          |
| 9        | c.150G>T  | p.Trp50Cys    | 4        |          |          |
| 10       | c.152G>A  | p.Cys51Tyr    | 4        |          |          |
| 11       | c.154A>G  | p.Thr52Ala    | 1        |          |          |
| 12       | c.197A>C  | p.His66Pro    | 2        |          |          |
| 13       | c.199C>T  | p.Arg67Trp    | 5        |          |          |
| 14       | c.200G>A  | p.Arg67Gln    | 5        | 4        |          |
| 15       | c.202G>T  | p.Gly68Cys    | 1        |          |          |
| 16       | c.205T>C  | p.Cys69Arg    | 1        |          |          |
| 17       | c.206G>A  | p.Cys69Tyr    | 1        |          |          |
| 18       | c.230G>A  | p.Cys77Tyr    | 1        |          |          |
| 19       | c.231C>G  | p.Cys77Trp    | 1        |          |          |
| 20       | c.235G>A  | p.Gly79Arg    | 1        |          |          |
| 21       | c.236G>A, | p.Gly79Glu    |          | 1        |          |
| 22       | c.266G>A  | p.Cys89Tyr    | 1        |          |          |
| 23       | c.269G>A  | p.Cys90Tyr    | 2        | 1        |          |
| 24       | c.283T>C  | p.Cys95Arg    | 1        |          |          |
| 25       | c.286A>G  | p.Asn96Asp    | 1        |          |          |
| 26       | c.293A>C  | p.(Asn98Thr)  |          |          | 1        |
| 27       | c.293A>G  | p.Asn98Ser    | 1        |          |          |
| 28       | c.88C>T   | p.Pro30Ser    | 1        |          |          |
| 29       | c.95T>G   | p.Val32Gly    | 1        |          |          |
| 30       | c.383C>A  | p.Ala128Asp   | 1        |          |          |
| 31       | c.526G>T  | p.Asp176Tyr   | 1        |          |          |
| 32       | c.536A>C  | p.Asp179Ala   | 1        |          |          |
| 33       | c.586A>G  | p.Arg196Gly   | 1        |          |          |
| 34       | c.589A>G  | p.(Thr197Ala) |          |          | 1        |
| 35       | c.590C>T  | p.Thr197Ile   | 1        |          | ..../    |

..../

| Missense | c.       | p.             | Series 3 | Series 2 | Series 1 |
|----------|----------|----------------|----------|----------|----------|
| 36       | c.632G>A | p.Gly211Asp    | 2        |          | 1        |
| 37       | c.632G>C | p.Gly211Ala    | 1        |          |          |
| 38       | c.643G>A | p.Glu215Lys    | 1        |          | 1        |
| 39       | c.656G>A | p.Gly219Asp    | 1        |          |          |
| 40       | c.656G>A | p.Gly219His    | 1        |          |          |
| 41       | c.667G>C | p.Gly223Arg    | 1        |          |          |
| 42       | c.670G>A | p.Gly224Lys    | 1        |          |          |
| 43       | c.632G>A | p.Gly225Asp    |          | 4        |          |
| 44       | c.676G>A | p.(Val226Met)  |          |          | 1        |
| 45       | c.686A>G | p.Lys229Arg    | 1        |          |          |
| 46       | c.686A>T | p.Lys229Met    | 1        |          |          |
| 47       | c.698C>T | p.Ser233Leu    | 1        |          |          |
| 48       | c.709C>A | p.Gln237Lys    | 1        |          |          |
| 49       | c.750G>C | p. Leu250Phe   |          | 1        |          |
| 50       | c.778A>C | p.Ile260Leu    | 1        |          |          |
| 51       | c.787G>A | p.Asp263Asn    |          | 1        |          |
| 52       | c.793A>C | p.Thr265Pro    | 1        |          |          |
| 53       | c.818T>C | p.Leu273Pro    | 1        |          |          |
| 54       | c.827T>C | p.Ile276Thr    | 1        |          |          |
| 55       | c.838C>A | p.His280Asp    | 1        |          |          |
| 56       | c.848G>T | p.Gly283Val    |          | 1        |          |
| 57       | c.851C>T | p.Ser284Phe    | 1        |          |          |
| 58       | c.853C>T | p.Leu285Phe    | 1        |          |          |
| 59       | c.866T>C | p.Leu289Pro    | 1        | 1        |          |
| 60       | c.875A>C | p.Gln292Pro    | 2        |          |          |
| 61       | c.890A>G | p.His297Arg    | 1        |          |          |
| 62       | c.905T>G | p.Leu302Arg    | 1        |          |          |
| 63       | c.913T>C | p.Ser305Pro    | 1        |          |          |
| 64       | c.916G>C | p.Ala306Pro    | 1        |          |          |
| 65       | c.920C>A | p.(Ala307Glu). |          | 1        |          |
| 66       | c.925G>A | p.Gly309Ser    | 2        | 1        |          |
| 67       | c.925G>T | Gly309Cys      | 1        |          |          |
| 68       | c.940C>T | p.His314Tyr    | 3        |          |          |
| 69       | c.956G>A | p.Gly319Asp    | 1        |          |          |
| 70       | c.983A>C | P.His328Pro    | 1        |          | ..../    |

| ..../<br>Missense | c.        | p.          | Series 3 | Series 2 | Series 1 |
|-------------------|-----------|-------------|----------|----------|----------|
| 71                | c.983A>C  | p.His328Pro | 1        |          |          |
| 72                | c.986G>A  | p.Arg329His | 1        |          |          |
| 73                | c.988G>A  | p.Asp330Asn | 1        |          |          |
| 74                | c.988G>T  | p.Asp330Tyr | 3        |          |          |
| 75                | c.992T>C  | p.Phe331Ser | 1        |          |          |
| 76                | c.997A>G  | p.Ser333Gly | 1        |          |          |
| 77                | c.998G>T  | p.Ser333Ile | 5        |          |          |
| 78                | c.1010T>C | p.Leu337Pro | 1        |          |          |
| 79                | c.1023C>G | p.Asn341Lys | 2        |          |          |
| 80                | c.1030T>C | p.Cys344Arg | 3        |          |          |
| 81                | c.1031G>A | p.Cys344Tyr | 7        |          |          |
| 82                | c.1031G>T | p.Cys344Phe | 2        |          |          |
| 83                | c.1039G>C | p.Ala347Pro | 3        |          |          |
| 84                | c.1048G>A | p.Gly350Ser | 1        |          |          |
| 85                | c.1048G>C | p.Gly350Arg | 2        |          |          |
| 86                | c.1054G>C | p.Ala352Pro | 1        |          |          |
| 87                | c.1055C>A | p.Ala352Asp | 1        |          |          |
| 88                | c.1061T>A | p.Met354Lys | 1        |          |          |
| 89                | c.1115C>T | p.Thr372Ile | 2        |          |          |
| 90                | c.1120C>T | p.Arg374Trp | 18       | 5        | 2        |
| 91                | c.1121G>A | p.Arg374Gln | 6        | 1        |          |
| 92                | c.1123T>C | p.Tyr375His | 2        |          |          |
| 93                | c.1126A>G | p.Met376Val | 3        |          |          |
| 94                | c.1127T>A | p.Met376Lys | 1        |          |          |
| 95                | c.1127T>C | p.Met376Thr | 1        |          |          |
| 96                | c.1127T>G | p.Met376Arg | 3        |          |          |
| 97                | c.1129G>A | p.Ala377Thr | 1        |          |          |
| 98                | c.1133C>A | p.Pro378His | 1        |          |          |
| 99                | c.1133C>T | p.Pro378Leu | 1        |          |          |
| 100               | c.1135G>A | p.Glu379Lys | 4        | 1        | 1        |
| 101               | c.1139T>G | p.Val380Gly | 2        |          |          |
| 102               | c.1157G>A | p.Arg386His | 1        |          |          |
| 103               | c.1189G>A | p.Asp397Asn | 1        |          |          |
| 104               | c.1190A>G | p.Asp397Gly | 1        |          |          |
| 105               | c.1193T>A | p.Ile398Asp | 2        |          |          |
| 106               | c.1196G>C | p.Trp399Ser | 1        |          | ..../    |

| ..../<br>Missense | c.        | p.          | Series 3 | Series 2 | Series 1 |
|-------------------|-----------|-------------|----------|----------|----------|
| 107               | c.1199C>A | p.Ala400Glu | 2        |          |          |
| 108               | c.1204G>A | p.Gly402Ser | 3        |          |          |
| 109               | c.1208T>C | p.Leu403Pro | 3        |          |          |
| 110               | c.1218G>C | p.Trp406Cys | 1        |          |          |
| 111               | c.1218G>T | p.Trp406Cys | 1        |          |          |
| 112               | c.1221G>T | p.Glu407Asp | 3        |          |          |
| 113               | c.1231C>T | p.Arg411Trp | 12       | 13       | 5        |
| 114               | c.1232G>A | p.Arg411Gln | 14       | 2        |          |
| 115               | c.1232G>C | p.Arg411Pro | 2        |          |          |
| 116               | c.1270C>A | p.Pro424Thr | 1        | 1        |          |
| 117               | c.1270C>T | p.Pro424Ser | 1        |          |          |
| 118               | c.1271C>T | p.Pro424Leu | 1        |          |          |
| 119               | c.1273T>G | p.Phe425Val | 1        |          |          |
| 120               | c.1275C>G | p.Phe425Leu | 3        |          |          |
| 121               | c.1276A>G | p.Tyr426Cys | 1        |          |          |
| 122               | c.1280A>T | p.Asp427Val | 2        |          |          |
| 123               | c.1297C>T | p.Pro433Ser | 1        |          |          |
| 124               | c.1298C>A | p.Pro433His |          |          | 1        |
| 125               | c.1298C>G | p.Pro433Arg | 1        |          |          |
| 126               | c.1313T>C | p.Met438Thr | 1        |          |          |
| 127               | c.1321G>A | p.Val441Met | 2        |          |          |
| 128               | c.1325T>C | p.Val442Ala |          | 1        |          |
| 129               | c.1346C>T | p.Pro449Leu | 1        |          |          |
| 130               | c.1355C>T | p.Pro452Leu | 2        |          |          |
| 131               | c.1436G>A | p.Arg479Gln | 1        | 1        |          |
| 132               | c.1436G>A | p.Arg479Glu | 2        |          |          |
| 133               | c.1436G>T | p.Arg479Leu | 1        |          |          |
| 134               | c.1445C>T | p.Ala482Val | 3        |          |          |
| 135               | c.1450C>T | p.Arg484Trp | 5        | 1        |          |
| 136               | c.1460A>C | p.Lys487Thr | 1        |          |          |
| 137               | c.1475T>A | p.Ile492Asn | 1        |          |          |

**Legend: Number of separate reports of stated pathogenic or likely pathogenic ACVRL1 missense substitutions (GenBank RefSeq NM\_000020.3) in three essentially independent series.** Series 1: Imperial database from new family gene test results from 2021-2023; Series 2: Imperial database 1992-2020; Series 3: HHT Mutation Database as downloaded 2018 (for full description see main text). Data are plotted for each variant as percentage of total missense variants per database in main manuscript Figure 5, where numbers correspond to the numbers in this Table.
